RESEARCH ARTICLE

# Machine Learning Driven Synthesis of Cobalt Oxide Entrapped Heteroatom-Doped Graphitic Carbon Nitride for Enhanced Oxygen Evolution Reaction

Abdullah Akhdhar<sup>1</sup>, Abdullah S. Al-Bogami<sup>1</sup>, Waleed A. El-Said<sup>1</sup>, Farhan Zafar<sup>2</sup>, Naeem Akhtar<sup>2</sup>

**1** College of Science, Department of Chemistry, University of Jeddah, Jeddah, Saudi Arabia, **2** Institute of Chemical Sciences, Bahauddin Zakariya University (BZU) Multan, Pakistan

\* [waahmed@uj.edu.sa](mailto:waahmed@uj.edu.sa)

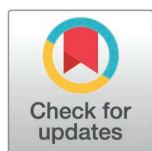

## OPEN ACCESS

**Citation:** Akhdhar A, Al-Bogami AS, El-Said WA, Zafar F, Akhtar N (2025) Machine learning driven synthesis of Cobalt oxide entrapped heteroatom-doped graphitic carbon nitride for enhanced Oxygen evolution reaction. PLoS One 20(6): e0324357. <https://doi.org/10.1371/journal.pone.0324357>

**Editor:** Karthik Kannan, National Chung Cheng University, Taiwan & Australian Center for Sustainable Development Research and Innovation (ACSDRI), AUSTRALIA

**Received:** January 22, 2025

**Accepted:** April 23, 2025

**Published:** June 11, 2025

**Copyright:** © 2025 Akhdhar et al. This is an open access article distributed under the terms of the [Creative Commons Attribution License](https://creativecommons.org/licenses/by/4.0/), which permits unrestricted use, distribution, and reproduction in any medium, provided the original author and source are credited.

**Data availability statement:** All relevant data are within the manuscript and its [Supporting Information](#) files.

## Abstract

Developing highly efficient electrocatalysts for the oxygen evolution reaction is hindered by sluggish multi-electron kinetics, poor charge transfer efficiency, and limited active site accessibility. Transition metal-based electrocatalysts, such as cobalt oxides, have shown promise. However, poor charge transfer efficiency, limited active site accessibility, and suboptimal interaction with support materials have lowered their oxygen evolution reaction performance. Additionally, optimization of materials remains a complex task, often relying on trial-and-error approaches that do not clearly understand the key features that govern oxygen evolution reaction performance. In this study, we have addressed these challenges through machine learning, which enables the systematic design and optimization of electrocatalysts. By leveraging machine learning, we have developed a highly effective cobalt oxide nanocrystal-based electrocatalyst embedded within sulfur and phosphorus-doped carbon nitride. The homogeneous distribution of cobalt oxide nanocrystals on the sulfur and phosphorus-doped carbon nitride substrate further improves the accessibility of active sites during electrochemical reactions, leading to enhanced oxygen evolution reaction performance. The cobalt oxide sulfur and phosphorus-doped carbon nitride catalyst has shown promising oxygen evolution reaction activity, characterized by a low overpotential of 262 mV, a Tafel slope of 66 mV dec<sup>-1</sup>, and a high electrochemically active surface area of 140.58 cm<sup>2</sup>. These results highlight the synergistic interaction between cobalt oxide and sulfur and phosphorus-doped carbon nitride, which contributes to the catalyst's superior electrocatalytic performance and provides a promising pathway for the design of advanced oxygen evolution reaction catalysts through machine learning-guided material optimization.

**Funding:** This work was supported by the Deputyship for Research & Innovation, Ministry of Education in Saudi Arabia through the project number MoE-IF-UJ-R2-22-04100454-1 awarded to A.A.

**Competing interests:** The authors have declared that no competing interests exist.

## 1. Introduction

Recently, environmental degradation due to the excessive use of fossil fuels to overcome the energy crisis has driven the scientific community toward the development of sustainable energy resources [1]. Among renewable energy resources, electrochemical water splitting has gained significant attention due to its ability to produce high-calorific hydrogen [2,3]. Electrocatalytic water splitting, a critical process for chemical energy conversion, involves two half-reactions: the oxygen evolution reaction (OER) and the hydrogen evolution reaction (HER) [4–6]. The OER is challenging due to its complex four-electron transfer process, converting two water molecules into one oxygen molecule [7,8]. Effective OER catalysts must enhance water adsorption, dissociation, charge transfer, and oxygen release to achieve high reaction rates and energy efficiency, necessitating low overpotentials for optimal performance [9,10].

Although noble metals such as iridium (Ir) and Ruthenium (Ru) exhibit excellent OER performance, their high cost has prohibitive widespread application [11]. Consequently, significant research has been directed toward developing cost-effective yet efficient alternatives [12–14]. In this regard, cobalt oxide ( $\text{Co}_3\text{O}_4$ ) has emerged as a promising material due to its unique structural and electronic properties.  $\text{Co}_3\text{O}_4$  with its mixed-valent spinel structure (Co II, III) enhances electron transfer kinetics during the OER process [15,16]. Compared to other metal oxides ( $\text{CuO}$ ,  $\text{MnO}_2$ , and  $\text{NiO}$ ), the spinel structure of  $\text{Co}_3\text{O}_4$  provides a high density of both octahedral and tetrahedral sites, resulting in a large number of catalytic active sites that facilitate efficient reactions [17,18]. Its Co(III) ions in the octahedral sites are particularly important for activating water molecules, thus promoting efficient OER. Additionally,  $\text{Co}_3\text{O}_4$  exhibits high stability under harsh electrochemical conditions, making it more reliable than other alternatives such as  $\text{MnO}_2$  and  $\text{NiO}$ . However, challenges such as aggregation and low conductivity can limit the efficiency of  $\text{Co}_3\text{O}_4$  by restricting access to active sites and impeding electron and proton transport during the oxidation process [19].

To address these limitations, there is a need to integrate  $\text{Co}_3\text{O}_4$  with conductive substrates such as carbon nitride ( $\text{g-C}_3\text{N}_4$ ), carbon nanotubes, and graphitic carbon [20,21]. This integration not only improves the material's conductivity but also optimizes its electronic structure, enhancing charge transfer and stability during the OER [21]. Moreover, the synergistic effect between  $\text{Co}_3\text{O}_4$  and doped or supporting materials can further enhance catalytic performance. The interaction between  $\text{Co}_3\text{O}_4$  and elements like sulfur, phosphorus, or nitrogen in  $\text{g-C}_3\text{N}_4$  promotes the formation of Co–N bonds, which are known to enhance catalytic activity. This synergy significantly improves the electronic properties of  $\text{Co}_3\text{O}_4$ , making it a more efficient electrocatalyst for OER. Doping  $\text{g-C}_3\text{N}_4$  with heteroatoms (e.g., I, P, S, and B) can improve its conductivity by altering its electronic structure, enhancing charge transfer, and making it a valuable substrate for catalysts in the OER [22]. Additionally, the high nitrogen content in  $\text{g-C}_3\text{N}_4$  offers numerous metal ion anchoring sites, which are beneficial for catalytic applications. Co–N interactions akin to Fe–N bonds have been shown to enhance photo electrocatalytic water splitting [23]. For example, Zou et al. demonstrated a significant increase in electrocatalytic activity with the formation of

Co–N bonds between g-C<sub>3</sub>N<sub>4</sub> and Co(OH)<sub>2</sub> [24,25]. Here, sulfur and phosphorus-doped g-C<sub>3</sub>N<sub>4</sub> (SP-CN) was employed as a support framework for Co<sub>3</sub>O<sub>4</sub> resulting in highly effective OER electrocatalysts.

Recently, machine learning (ML) has garnered significant attention in materials science and catalysis due to its advanced predictive capabilities [26]. ML helps the researchers to optimize the material properties such as adsorption energy, and active sites to design highly efficient electrocatalysts [27,28]. ML's finely tuned variables and identifying critical factors influencing electrocatalytic activity significantly reduce the time and costs typically associated with conventional trial-and-error techniques [29,30]. Moreover, ML not only accelerates the discovery and optimization of electrocatalysts but also provides a more systematic and data-driven approach to understand the underlying mechanisms that govern electrocatalytic reactions [31]. This holistic approach is paving the way for the next generation of electrocatalysts, which are both more efficient and economically viable, contributing significantly to the advancement of sustainable energy technologies [32,33].

Inspired by the issues mentioned above, we have employed ML as a novel approach to optimize and design a robust Co<sub>3</sub>O<sub>4</sub>/SP-CN-based nanocomposite. This work introduces a novel Co<sub>3</sub>O<sub>4</sub>/SP-CN composite with S and P doping and also highlights ML as an innovative approach to finely tune the material's properties. The integration of Co<sub>3</sub>O<sub>4</sub> with SP-CN facilitates the formation of Co–N bonds, enhancing charge transfer rates. The designed composite (Co<sub>3</sub>O<sub>4</sub>/SP-CN) has shown high electrocatalytic activity by exhibiting low overpotential (262 mV), and a Tafel slope of 66 mV dec<sup>−1</sup> that could be ascribed to the sulfur and phosphorus-doped, defect-rich g-CN structure include its strong interaction with the electrode and a high density of catalytic active sites. The uniform distribution of Co<sub>3</sub>O<sub>4</sub> nanocrystals on SP-CN resulted in a highly conductive catalyst with minimal Co<sub>3</sub>O<sub>4</sub> agglomeration. Consequently, the OER activity of the Co<sub>3</sub>O<sub>4</sub>/SP-CN composites was significantly enhanced. Additionally, the even dispersion of Co<sub>3</sub>O<sub>4</sub> nanocrystals on SP-CN increased the availability of active sites for OER, thereby boosting overall catalytic performance.

## 2. Experimental section

### 2.1 Chemicals and reagents

All the chemicals and reagents, i.e., ethylene glycol (99.9%), sodium nitrate (NaNO<sub>3</sub>, 99.9%), thiourea (99.9%), cobalt(II) nitrate hexahydrate (Co(NO<sub>3</sub>)<sub>2</sub>·6H<sub>2</sub>O, 99.9%), diammonium hydrogen phosphate (NH<sub>4</sub>)<sub>2</sub>HPO<sub>4</sub>, 99%), nitric acid (HNO<sub>3</sub>, 98%), and ammonium hydroxide (NH<sub>4</sub>OH, 25–28%) were purchased from Sinopharm Chemical Reagent Co. (Shanghai, China).

### 2.2 Synthesis of g-CN and SP-CN

SP-CN was fabricated via a reported approach [34]. In this process, 20 mg of (NH<sub>4</sub>)<sub>2</sub>HPO<sub>4</sub> was utilized as the phosphorus source, combined with 5.0 g of thiourea in an alumina crucible. The mixture was then subjected to thermal treatment in the air atmosphere, heating to 550°C at a rate of 10°C/min and maintaining this temperature for one hour; this step induced ammonia release through thermal polycondensation [35,36]. After the heating phase, the crucible was allowed to cool to room temperature inside the oven. The obtained product underwent three rinses with distilled deionized water and 100% ethanol, followed by air-drying at 50°C for 24 hours. Subsequently, the dried material was finely ground using a pestle and mortar.

### 2.3 Synthesis of Co<sub>3</sub>O<sub>4</sub> nanoparticles (Co<sub>3</sub>O<sub>4</sub> NPs)

Cobalt oxide nanoparticles (Co<sub>3</sub>O<sub>4</sub> NPs) were synthesized via a conventional hydrothermal method [37,38]. First, 1.5 g of cobalt chloride hexahydrate (CoCl<sub>2</sub>·6H<sub>2</sub>O) was dissolved in 30 mL of deionized water. The CoCl<sub>2</sub> solution was mixed with the ammonium hydroxide solution while stirring continuously at 250–350 rpm. This mixture was transferred to an autoclave and subjected to hydrothermal treatment at 160°C for 8 hours. Following the reaction, the autoclave was allowed to cool to 25°C. The resulting product was a dark powder comprising Co<sub>3</sub>O<sub>4</sub> NPs.

## 2.4 Synthesis of cobalt oxide (Co<sub>3</sub>O<sub>4</sub>) entrapped in SP-CN (Co<sub>3</sub>O<sub>4</sub>/SP-CN)

Co<sub>3</sub>O<sub>4</sub>/SP-CN was synthesized according to the previously reported approach [34]. Briefly, 50 mg of SP-CN and 50 mg of Co<sub>3</sub>O<sub>4</sub> NPs were dissolved in ethanol. The solution was then subjected to continuous magnetic stirring and heating until the solvent was fully evaporated. After drying at 50°C for 24 hours, the remaining residue was subjected to heat treatment at 550°C for three hours. The resulting product was a brown composite of Co<sub>3</sub>O<sub>4</sub>/SP-CN.

## 3. Results and discussion

The surface morphology of SP-CN and Co<sub>3</sub>O<sub>4</sub>/SP-CN composite was examined using scanning electron microscopy (SEM) (Fig 1). SEM images of SP-CN showed the presence of two-dimensional (2D) sheets with an irregular, flat structure and numerous wrinkles (Fig 1A). In contrast, SEM images of Co<sub>3</sub>O<sub>4</sub>/SP-CN (Fig 1B) revealed well-dispersed Co<sub>3</sub>O<sub>4</sub> nanoparticles (NPs) across the 2D sheets, with sizes ranging from 20 to 40 nm in diameter. The size of Co<sub>3</sub>O<sub>4</sub> nanocrystals plays a significant role in the OER, as smaller NPs with their high surface-to-volume ratio tend to have higher surface area, enhancing their catalytic activity in electrochemical reactions. Additionally, SEM images highlight the homogeneous dispersion of Co<sub>3</sub>O<sub>4</sub> NPs on SP-CN sheets. This homogeneous dispersion will ensure optimal exposure of active sites leading to efficient electron transfer kinetics. Additionally, EDX mapping (Fig 1C–1F) confirms the successful fabrication of the Co<sub>3</sub>O<sub>4</sub>/SP-CN composite. The EDX mappings for Co (Fig 1C), O (Fig 1D), C (Fig 1E), and N (Fig 1F) indicate a homogeneous distribution of these elements across the surface.

The surface elemental composition and chemical states of the Co<sub>3</sub>O<sub>4</sub>/SP-CN composite were analyzed using X-ray photoelectron spectroscopy (XPS). The XPS spectra showed the presence of P, S, C, N, O and Co without any other contaminants (Fig 2). The Co 2p spectra displayed peaks for Co<sup>3+</sup> and Co<sup>2+</sup> at 781.1 & 797.5 eV, and 782.7 & 801.3 eV, respectively, along with satellite peaks at 804.1 and 786.5 eV (Fig 2A), indicating higher binding energies. Peaks at 779.6 and 795.0 eV were assigned to the Co-Nx structure in Co<sub>3</sub>O<sub>4</sub>/SP-CN (Fig 2A). The O 1s spectra showed peaks at 530.1, 531.3, and 532.1 eV, corresponding to surface H<sub>2</sub>O, adsorbed oxygen, and lattice oxygen in Co<sub>3</sub>O<sub>4</sub>, respectively (Fig 2B). The P 2p spectra indicated binding energy maxima for P-O, P=N, and P-N bonds at 133.2, 134, and 135 eV, respectively.

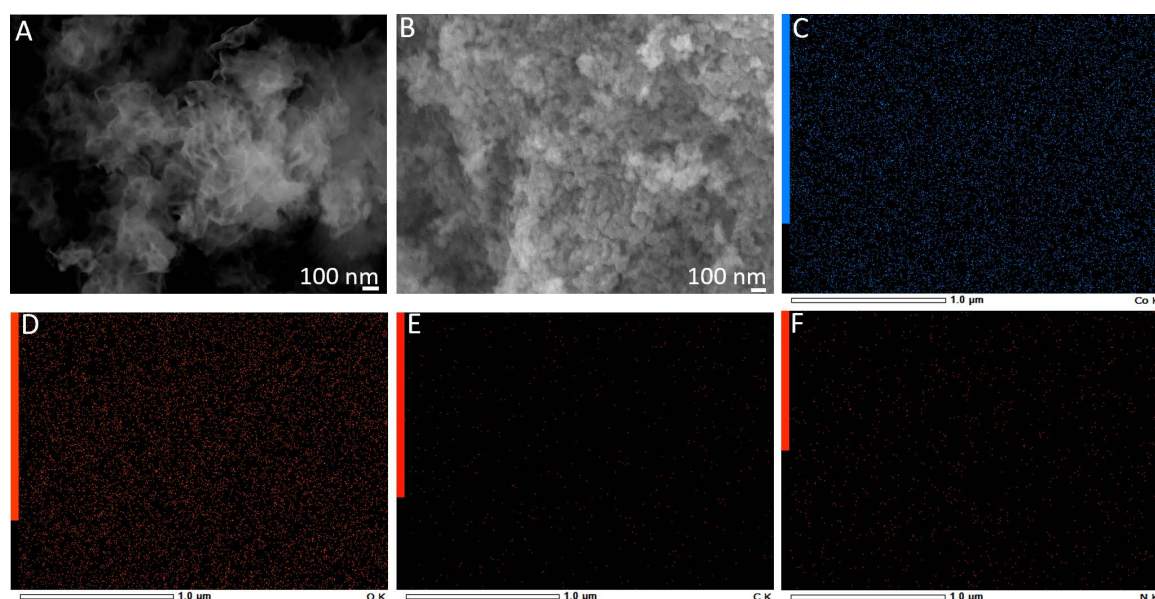

**Fig 1.** SEM images of (A) SP-CN, (B) Co<sub>3</sub>O<sub>4</sub>/SP-CN. EDX mapping of (C) Co, (D) O, (E) C, and (F) N.

<https://doi.org/10.1371/journal.pone.0324357.g001>



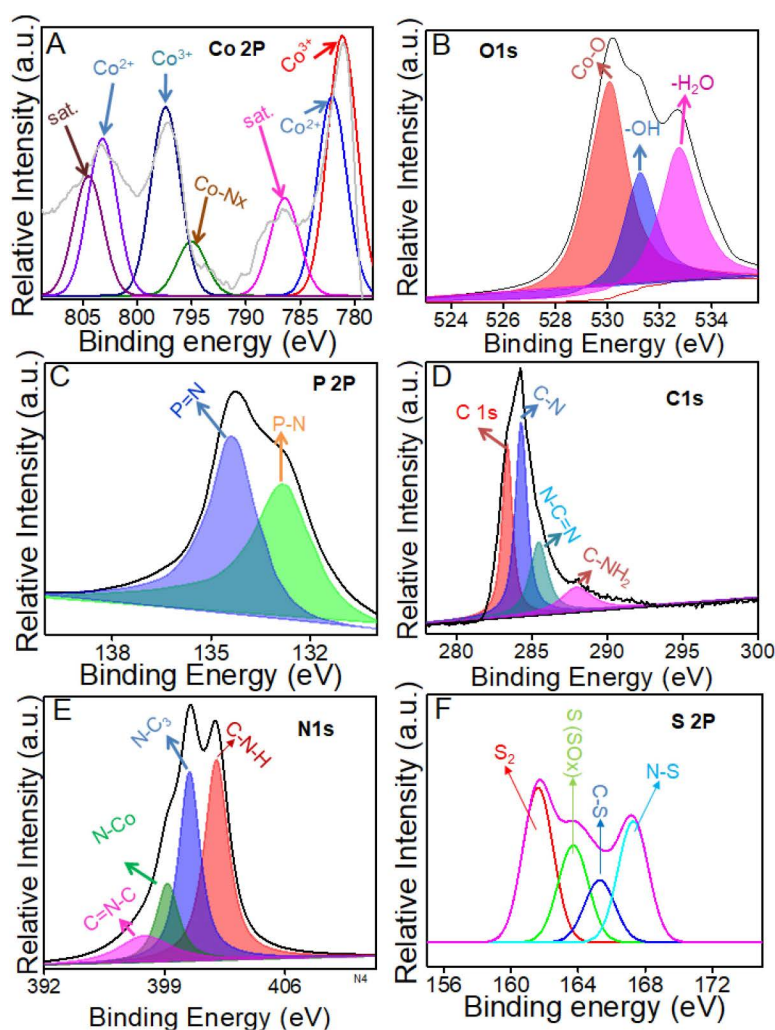

**Fig 2. Representing XPS spectra of Co<sub>3</sub>O<sub>4</sub>/SP-CN (A) Co, (B) O, (C) P, (D) C, (E) N, and (F) S.**

<https://doi.org/10.1371/journal.pone.0324357.g002>

While higher binding energies for P=N, and P-N bonds compared to P-C coordination suggested phosphorus substitution for carbon in the triazine rings [39,40] (Fig 2C). Deconvolution of the C 1s XPS spectra for Co<sub>3</sub>O<sub>4</sub>/SP-CN identified peaks at 284.6, 286.3, 288.1, and 289.0 eV, corresponding to C-N, and Sp<sup>2</sup>-bonded C in N-C=N, respectively [41] (Fig 2D). The N 1s XPS spectra for SP-CN displayed peaks at 397.8, 400.4, and 402.01 eV for C=N-C, N-C<sub>3</sub>, and C-NH<sub>2</sub>, respectively, with an additional peak at 399.1 eV indicating the Co-N bond in Co<sub>3</sub>O<sub>4</sub>/SP-CN (Fig 2E). Fig 2F confirms the presence of S with different binding interactions. These findings align with the literature, confirming the successful synthesis of the Co<sub>3</sub>O<sub>4</sub>/SP-CN composite [34].

X-ray diffraction (XRD) was used to assess the crystallinity and phase purity of Co<sub>3</sub>O<sub>4</sub> and Co<sub>3</sub>O<sub>4</sub>/SP-CN [34] (Fig 3A). The XRD pattern confirmed the presence of Co<sub>3</sub>O<sub>4</sub>, with diffraction planes at 2θ angles of 31.37°, 36.87°, 38.67°, 44.87°, 55.62°, 59.56°, 65.47°, and 77.41° corresponding to the (220), (311), (222), (400), (442), (511), (440), and (533) planes, respectively, in agreement with JCPDS# 74–2120 [34]. The presence of SP-CN was confirmed by peaks at 2θ of 13.0° and 27.7°, corresponding to the (002) diffraction plane (Fig 3B). Sulfur and phosphorus in CN caused a positive shift in the 2θ value, attributed to increased interplanar distance and lattice distortions (Fig 3C) [42,43].

Raman spectroscopy was employed to analyse the graphitic carbon content in  $\text{Co}_3\text{O}_4/\text{SP-CN}$  and SP-CN. The Raman spectra (Fig 3D) showed two prominent bands: the G-band at approximately  $1590\text{ cm}^{-1}$ , indicative of quasi-graphitic carbon layers, and the D-band at around  $1354\text{ cm}^{-1}$ , indicative of disordered carbon. The D-band represents structural disruptions, while the G-band corresponds to  $\text{Sp}^2$ -hybridized graphitic layers [44,45]. The degree of graphitization is often quantified by the intensity ratio of the D-band to the G-band ( $I_D/I_G$ ).  $\text{Co}_3\text{O}_4/\text{SP-CN}$  exhibited a higher  $I_D/I_G$  ratio of 1.39 compared to SP-CN, indicating increased graphitization and surface defects. The presence of a 2D band suggested that co-doping with sulfur and phosphorus promoted  $\text{Sp}^3$  hybridization in some graphitic layers, enhancing conductivity and electron transport [46,47].

The Fourier transform infrared (FTIR) spectroscopy was carried out to study the stretching and bending vibrational modes of  $\text{Co}_3\text{O}_4$  and  $\text{Co}_3\text{O}_4/\text{SP-CN}$  (S1 Fig). FTIR spectrum of  $\text{Co}_3\text{O}_4$  has shown two prominent bands at  $571\text{ cm}^{-1}$  and  $664\text{ cm}^{-1}$ , which are attributed to the stretching vibrations of  $\text{Co}^{3+}$  and oxygen, confirming the presence of spinel  $\text{Co}_3\text{O}_4$ . In the case of  $\text{Co}_3\text{O}_4/\text{SP-CN}$ , a band at  $1630\text{ cm}^{-1}$  corresponding to C=N stretching, along with absorption peaks in the  $1250\text{--}1400\text{ cm}^{-1}$  range, indicate C–N stretching typical of tertiary amines. These features suggest the presence of a conjugated C–N framework within graphitic carbon nitride (g- $\text{C}_3\text{N}_4$ ), confirming the formation of an extended  $\pi$ -conjugated structure. Furthermore, peaks in the  $1280\text{--}1350\text{ cm}^{-1}$  are attributed to P=N bonds, while those between  $1050\text{--}1150\text{ cm}^{-1}$  correspond to C–S or S–N bonds, confirming the successful integration of S and P into the material's structure.

The BET surface analysis of  $\text{Co}_3\text{O}_4/\text{SP-CN}$  and SP-CN was carried out using nitrogen ( $\text{N}_2$ ) adsorption-desorption isotherms to evaluate its surface area and pore volume (S2 Fig). The  $\text{N}_2$  adsorption-desorption isotherm displayed a typical IV-type isotherm with a distinct hysteresis loop, indicating mesoporous characteristics. The  $\text{Co}_3\text{O}_4/\text{SP-CN}$  has shown a high specific surface area of  $141\text{ m}^2/\text{g}$  compared to SP-CN ( $81\text{ m}^2/\text{g}$ ). This high surface area of  $\text{Co}_3\text{O}_4/\text{SP-CN}$  with porosity will facilitate better electron and ion transport leading to fast OER reaction kinetics.

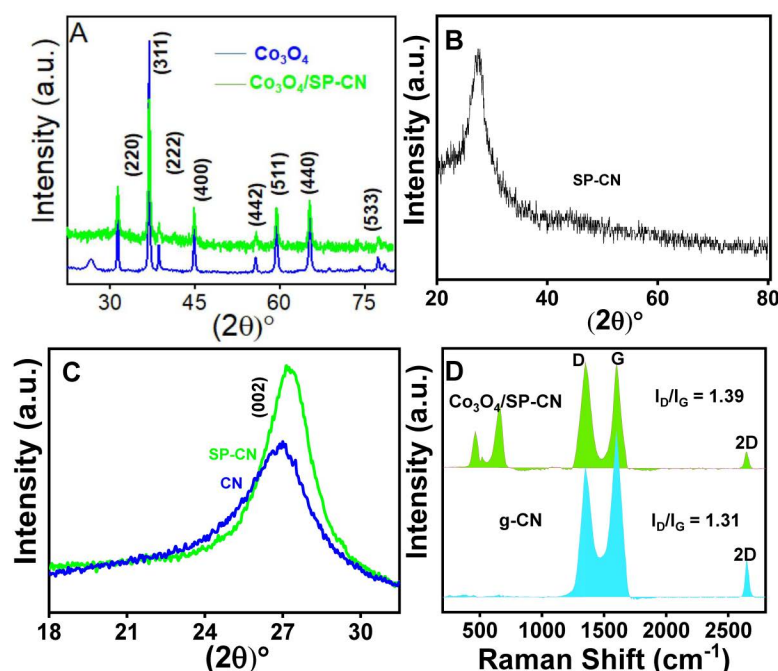

Fig 3. Representing XRD pattern of (A)  $\text{Co}_3\text{O}_4$  and  $\text{Co}_3\text{O}_4/\text{SP-CN}$ , (B) SP-CN, (C) SP-CN, CN and (D) Raman spectra of g-CN,  $\text{Co}_3\text{O}_4/\text{SP-CN}$ .

<https://doi.org/10.1371/journal.pone.0324357.g003>

### 3.1. Optimization of material composition to minimize the overpotential through ML

Several ML regression models were employed to design highly efficient electrocatalysts with minimized overpotential. These models included linear regression (LR), K-nearest neighbors regression (KNNR), random forest regression (RFR), ridge regression (RR), gradient boosting regression (GBR), and extreme gradient boosting regression (XGBR). The ML models were trained on the experimental dataset to optimize the concentration of Co, P, S-CN, and the amount of material deposited, aiming to predict overpotential. Each ML model was trained on preliminary experimental dataset to effectively minimize overpotential as a function of the variables mentioned. The predictive capabilities of each ML model are illustrated in Fig 4A. Among these models, the XGBR model stands out, showing the most effective optimization and prediction of low overpotential, with a high coefficient of regression ( $R^2=94.25\%$ ). This model's strength lies in its ability to handle complex, nonlinear relationships and interactions between experimental variables, without assuming linearity, making it well-suited for modeling intricate experimental data and accurately predicting overpotential in electrocatalyst design. The RFR and GBR models also demonstrated strong predictive performance, with  $R^2$  values of 92.31% and 91.79%, respectively, highlighting their robustness in capturing nonlinear relationships. In contrast, models like LR, RR, and KNNR exhibited higher Root Mean Square Errors (RMSEs) and lower  $R^2$  values, suggesting potential overfitting and reduced predictive accuracy (S1 Table). These findings emphasize the XGBR model's capability to generalize effectively across various scenarios, making it a powerful tool for optimizing material composition and enhancing electrocatalyst efficiency (S3 Fig).

Moreover, the Pearson correlation matrix provides further insight into the relationships between Co, P, S-CN, deposited material, and overpotential, which is crucial for designing efficient electrocatalysts (Fig 4B). The analysis reveals a strong

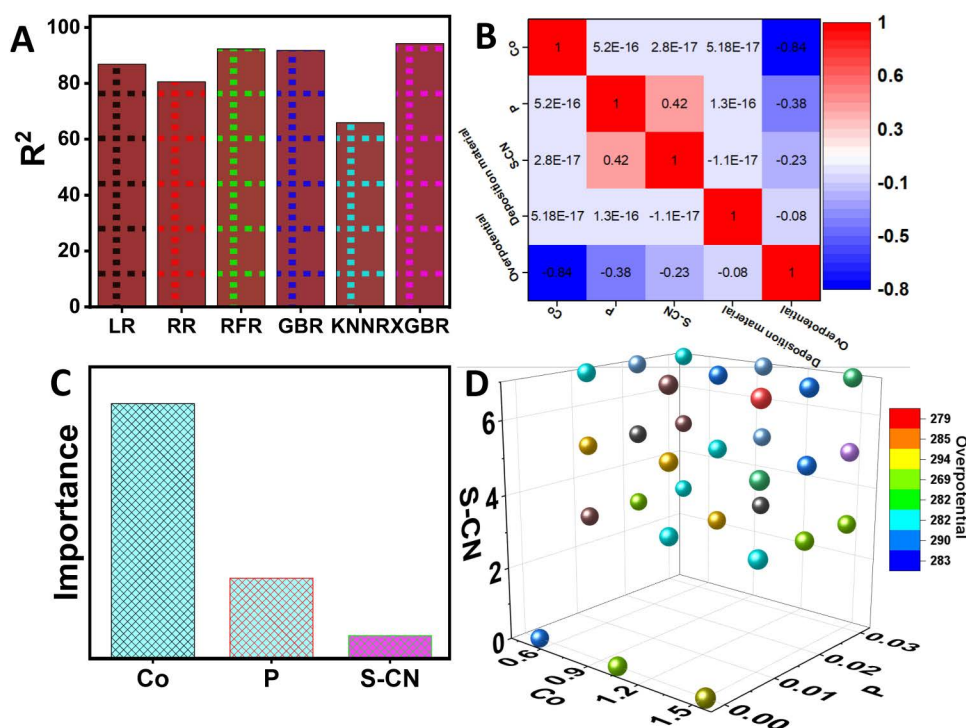

**Fig 4. Comparative analysis of electrocatalyst performance.** (A) Bar chart showing key experimental variables affecting OER activity. (B) Correlation matrix heatmap with color-coded strengths. (C) importance feature graph, and (D) 3D scatter plot linking SP-CN doping levels to OER efficiency, indicating variable influence.

<https://doi.org/10.1371/journal.pone.0324357.g004>

negative correlation between Co and overpotential ( $-0.84$ ), indicating that higher concentrations of Co significantly reduce overpotential. P shows a moderate negative correlation with overpotential ( $-0.38$ ), suggesting a decrease in overpotential with increasing P concentration. Meanwhile, S-CN and the material deposited exhibit weak negative correlations with overpotential ( $-0.23$  and  $-0.08$ , respectively), indicating their minimal impact on overpotential. These results highlight the significant role of Co in lowering overpotential, while P and S-CN have relatively minor effects.

Furthermore, feature importance analysis identifies Co as the most critical factor in controlling overpotential, followed by P, with S-CN having the least influence (Fig 4C). A 3D scatter plot has been utilized to determine the optimal combination of Co, P, S-CN, and deposited material that minimizes overpotential, thereby enhancing the catalytic efficiency of the synthesized materials (Fig 4D). This data-driven approach refines the synthesis process by providing precise control over material properties, significantly advancing catalyst performance in OER applications. The method not only simplifies the optimization process but also establishes a solid foundation for the rational design of high-performance catalytic material. The 3D scatter plot specifically identifies the optimal concentrations of Co (1.5), P (0.02), S-CN (5), and deposited material (1.5), corresponding to a minimum overpotential of 262 mV. This ML-driven analysis underscores the importance of optimizing Co, P, S-CN and depositing material concentrations for OER applications.

### 3.2 . Electrocatalytic activity of $\text{Co}_3\text{O}_4$ and $\text{Co}_3\text{O}_4/\text{SP-CN}$

The electrocatalytic performance of the synthesized materials was assessed using a three-electrode setup, comprising a Pt wire as the counter electrode, an Ag/AgCl electrode as the reference, and a customized nickel foam electrode as the working electrode. Linear sweep voltammetry (LSV) and cyclic voltammetry (CV) were performed at a scan rate of 100 mV/s in 1 M KOH, covering a potential range from 0 to 2 V vs. RHE, to determine the onset potential for each material (Fig 5A, 5B). The LSV results revealed that  $\text{Co}_3\text{O}_4/\text{SP-CN}$  exhibited a lower onset potential of 1.43 V vs. RHE compared to  $\text{Co}_3\text{O}_4$ , which had an onset potential of 1.52 V vs. RHE. Moreover, at a current density of 10 mA/cm<sup>2</sup>,  $\text{Co}_3\text{O}_4/\text{SP-CN}$  demonstrated a reduced overpotential of 262 mV vs. RHE, in contrast to 303 mV vs. RHE for  $\text{Co}_3\text{O}_4$ . The occurrence of swirling at the electrode surface during LSV further indicated the activation. For a deeper understanding of the reaction kinetics, the Tafel slope was derived by plotting the logarithm of current density ( $\log j$ ) against overpotential (Fig 5C). The data indicated that  $\text{Co}_3\text{O}_4/\text{SP-CN}$  had a lower Tafel slope of 66 mV/dec compared to  $\text{Co}_3\text{O}_4$ , which had a Tafel slope of 80.3 mV/dec. The results indicate that  $\text{Co}_3\text{O}_4/\text{SP-CN}$  promotes significantly faster and more efficient OER kinetics compared to other comparable electrocatalysts (S2 Table). This enhanced electrocatalytic performance can be attributed to the effective stabilization and facilitation of intermediate species at the uniformly distributed  $\text{Co}_3\text{O}_4$  active sites.

Electrochemical impedance spectroscopy (EIS) was carried out to investigate the electron transfer resistance associated with the OER process. EIS data was fitted using a Randles equivalent circuit consisting of solution resistance ( $R_s$ ), charge transfer resistance ( $R_{ct}$ ), and double-layer capacitance ( $C_{dl}$ ), providing insight into electrochemical behavior. The EIS-fitted Nyquist plot (Fig 5D) of  $\text{Co}_3\text{O}_4/\text{SP-CN}$  had shown the lowest  $R_{ct}$  (3.8  $\Omega$ ) as compared to  $\text{Co}_3\text{O}_4$  (4.4  $\Omega$ ). This enhanced performance can be attributed to S and P co-doping, which introduces structural defects in g-CN. These defects not only improve electrical conductivity but also strengthen the interaction between SP-CN,  $\text{Co}_3\text{O}_4$ , and the electrode surface. Additionally, the defect-rich structure increases the density of exposed catalytic active sites, collectively promoting faster reaction kinetics and enhancing the overall OER activity.

The electrocatalytic active surface area of the electrode was determined by evaluating the double-layer capacitance ( $C_{dl}$ ) within the non-faradaic region through the CV performed in 0.1 M PBS at varying scan rates from 5 mV/s to 25 mV/s (Fig 6A). A linear correlation was observed between the current density and the scan rate (Fig 6B). The electroactive surface area and  $C_{dl}$ , calculated from the slope in Fig 6A, were 140 cm<sup>2</sup> and 5.6 mF/cm<sup>2</sup>, respectively. These results indicate that SP-CN enhances the electrocatalytic performance of  $\text{Co}_3\text{O}_4$  by increasing the number of accessible catalytic sites and facilitating rapid charge transfer. The improved activity is attributed to the strong Co-N binding interactions between  $\text{Co}_3\text{O}_4$  and g-CN, as well as the surface charge defects introduced by sulfur and phosphorus doping.



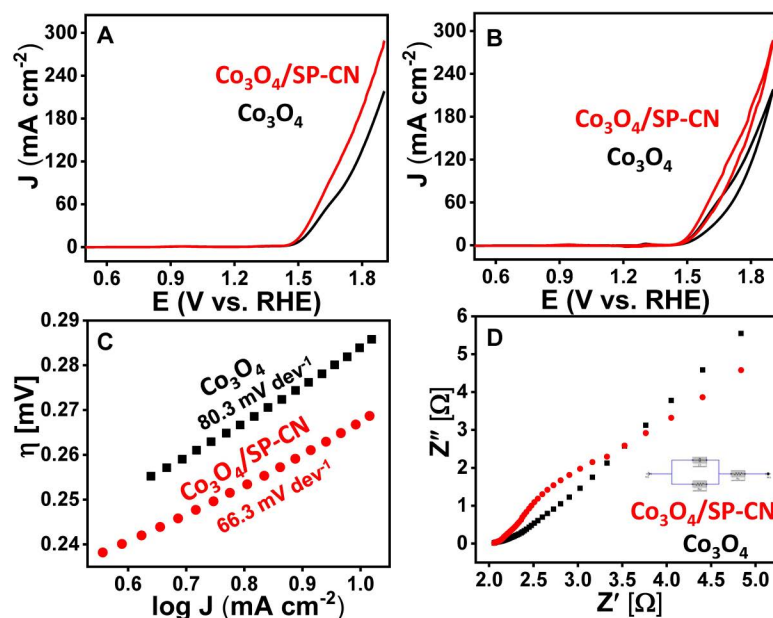

Fig 5. Electrocatalysis measurements of  $\text{Co}_3\text{O}_4$  and  $\text{Co}_3\text{O}_4/\text{SP-CN}$  (A) LSV, (B) CV, (C) Tafel plot, and (D) EIS.

<https://doi.org/10.1371/journal.pone.0324357.g005>

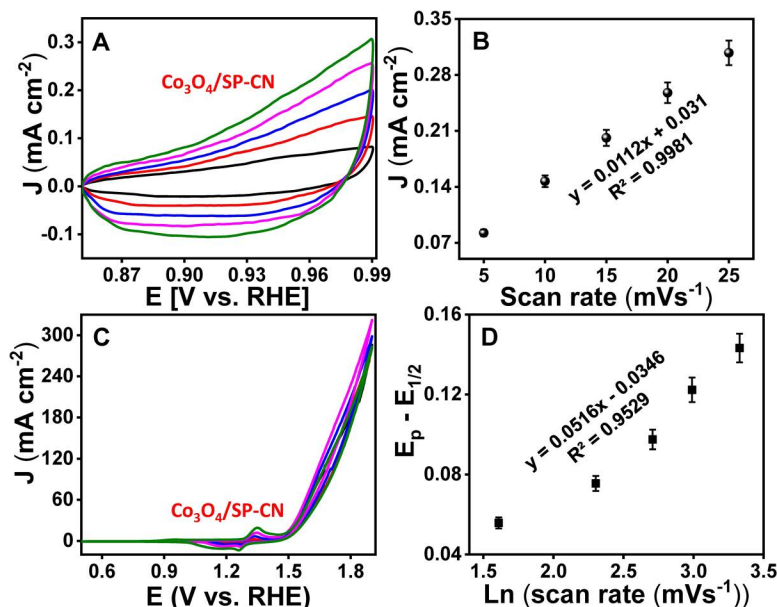

Fig 6. Evaluation of electrocatalytic activity (A) CV in the non-faradaic region, (B) Calibration curve  $\text{Co}_3\text{O}_4/\text{SP-CN}$ , (C) CV, and (D) calibration curve.

<https://doi.org/10.1371/journal.pone.0324357.g006>

### 3.3. Reaction kinetics and mechanistic investigations

The number of electrons involved in the OER was calculated by analyzing the relationship between the applied potential and the natural logarithm of the scan rate, which varied from 5 to 50  $\text{mV/s}$  (Fig 6C). This evaluation was conducted following the Laviron equation (Eq. 1).

$$E_c = E_{1/2} - \left( \frac{RT}{\alpha n F} \right) * \ln \left( \frac{\alpha n F}{RT k_s} \right) - \left( \frac{RT}{\alpha n F} \right) * \ln(v) \quad (1)$$

$$\text{Slope} = 2.303RT/\alpha n F \quad (2)$$

In this analysis,  $E_c$  represents the reduction potential, while  $E_{1/2}$  denotes the formal potential of the metal redox process.  $R$ ,  $T$ ,  $F$ , and  $k_s$  correspond to the gas constant, absolute temperature, Faraday constant, and average rate constant for the redox reaction, respectively. The electron transfer coefficient and the number of electrons transferred are denoted by  $\alpha$  and  $n$ , respectively. Using Eq. 2, the electron transfer and the number of electron-proton transfers were calculated to be 3.89 and 0.812, respectively (Fig 6D). To investigate the reaction kinetics, the Laviron equation (Eq. 1) was applied to determine the  $k_s$  values, providing insights into the adsorption properties of the newly developed electrodes.

CV experiments were performed for  $\text{Co}_3\text{O}_4/\text{SP-CN}$  and  $\text{Co}_3\text{O}_4$  in 1 M KOH at scan rates ranging from 5 to 50 mV/s. The data revealed that both  $\text{Co}_3\text{O}_4/\text{SP-CN}$  and  $\text{Co}_3\text{O}_4$  exhibited stable redox currents, with a linear correlation between the applied potential and the natural logarithm of the scan rate. Notably, the  $k_s$  value for  $\text{Co}_3\text{O}_4/\text{SP-CN}$  ( $0.73 \text{ s}^{-1}$ ) was higher than that of  $\text{Co}_3\text{O}_4$  ( $0.44 \text{ s}^{-1}$ ), suggesting more efficient metal binding to  $\text{OH}^-$  species on the electrode surface. These findings align with the proposed OER mechanism, which is supported by literature and involves a four-electron-proton transfer process accompanied by oxo-intermediate formation (Eqn. 3–6) on the electrode surface.

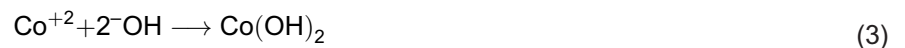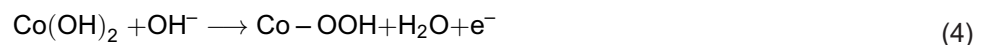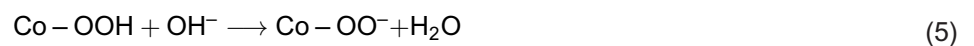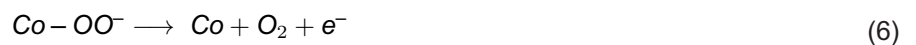

Briefly, Co undergoes the oxidation from  $\text{Co}^{2+}$  to  $\text{Co}^{3+}$  on exposure to alkaline media (KOH), resulting in the formation of OER different intermediates ( $\text{Co}(\text{OH})_2$ ,  $\text{Co}-\text{OOH}$ ,  $\text{Co}-\text{OO}^-$ ). These intermediates finally result in the evolution of  $\text{O}_2$  at the electrode surface [48]. This mechanism aligns with existing literature [49]. The efficient and fast production of  $\text{O}_2$  is supported to high surface-to-volume ratio and homogeneous dispersion of  $\text{Co}_3\text{O}_4$  NPs on SP-CN sheets. This homogeneous dispersion enhanced  $\text{OH}^-$  adsorption due to strong interactions between the metal and the  $\text{OH}^-$  intermediate leading to efficient electron transfer kinetics.

Chronoamperometric tests conducted at 1.40 V vs. RHE over 24 hours in a 1 M KOH solution showed that  $\text{Co}_3\text{O}_4/\text{SP-CN}$  sustained a current density above  $35 \text{ mA/cm}^2$  with minimal performance degradation (Fig 7A). However, after the stability test, the XRD pattern revealed a slight decline in peak intensity and broadening of the diffraction peaks (red), suggesting a partial loss of crystallinity (Fig S4). This change is indicative of phase instability, reflecting the material's degradation over time. Furthermore, XPS has been carried out to investigate the structural integrity of  $\text{Co}_3\text{O}_4/\text{SP-CN}$  following the stability test. XPS spectra has shown minimal variations in binding energy and peak intensities, indicating that each element chemical state almost remains the same (Fig S5). Contact angle measurements of  $\text{Co}_3\text{O}_4$  (Fig 7B) indicate

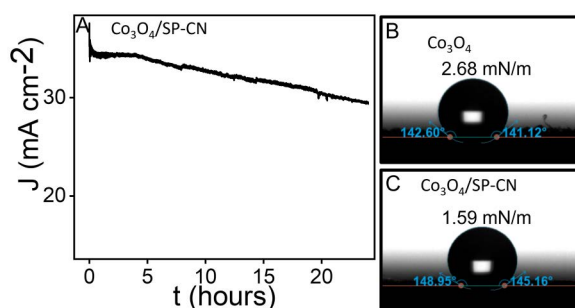

**Fig 7. (A) Chronoamperometric measurement representing stability, (B) Contact angle measurement  $\text{Co}_3\text{O}_4$ , and (C)  $\text{Co}_3\text{O}_4/\text{SP-CN}$ .**

<https://doi.org/10.1371/journal.pone.0324357.g007>

a higher binding energy as compared to  $\text{Co}_3\text{O}_4/\text{SP-CN}$  (Fig 7C). The lower binding energy observed in  $\text{Co}_3\text{O}_4/\text{SP-CN}$  contributes to improved stability of the system. This reduction in binding energy is attributed to the strong cohesive interactions within the  $\text{Co}_3\text{O}_4/\text{SP-CN}$  nanocomposite, as supported by prior studies [26]. Furthermore, the OER performance of this electrocatalyst, particularly in terms of onset potential, is comparable to or exceeds that of various chalcogenides and MOF-based metal electrocatalysts reported in the literature.

#### 4. Conclusions

In this study, we synthesized ML-optimized novel and cost-effective  $\text{Co}_3\text{O}_4/\text{SP-CN}$ -based nanocomposite by pyrolyzing thiourea and subsequently combining it with cobalt salt and diammonium phosphate. The designed composite ( $\text{Co}_3\text{O}_4/\text{SP-CN}$ ) has shown high electrocatalytic activity by exhibiting low overpotential (262 mV), and a Tafel slope of  $66 \text{ mV dec}^{-1}$  that could be ascribed to the sulfur and phosphorus-doped, defect-rich g-CN structure include its strong interaction with the electrode and a high density of catalytic active sites. ML has identified Co as the key element controlling OER efficacy followed by P, S-CN. Additionally, chronoamperometric measurements confirmed the high stability and durability of the catalyst, further validating its potential for long-term use in OER applications.

#### Supporting information

**S1 File. Machine learning.**  
(DOCX)

#### Acknowledgments

The authors extend their appreciation to the Deputyship for Research & Innovation, Ministry of Education in Saudi Arabia for their technical and financial support.

#### Author contributions

**Conceptualization:** Abdullah Akhdhar, Abdullah S. Al-Bogami, Waleed A. El-Said, Farhan Zafar, Naeem Akhtar.

**Data curation:** Waleed A. El-Said, Farhan Zafar, Naeem Akhtar.

**Formal analysis:** Waleed A. El-Said, Farhan Zafar.

**Methodology:** Naeem Akhtar.

**Writing – original draft:** Abdullah Akhdhar, Abdullah S. Al-Bogami, Waleed A. El-Said, Farhan Zafar, Naeem Akhtar.

## References

1. Awan AB, Khan ZA. Recent progress in renewable energy—remedy of energy crisis in Pakistan. *Renewable and Sustainable Energy Reviews*. 2014;33:236–53.
2. Mehrpooya M, Habibi R. A review on hydrogen production thermochemical water-splitting cycles. *Journal of Cleaner Production*. 2020;275:123836. <https://doi.org/10.1016/j.jclepro.2020.123836>
3. Zafar F, et al. Bioinspired N rich C wrapped ZIF-8: A highly efficient and durable electro-catalyst for oxygen reduction reaction. *Materials Chemistry and Physics*. 2023;293:126985.
4. Tahir M, et al. Electrocatalytic oxygen evolution reaction for energy conversion and storage: A comprehensive review. *Nano Energy*. 2017;37:136–57.
5. Jamesh MI. Recent progress on earth abundant hydrogen evolution reaction and oxygen evolution reaction bifunctional electrocatalyst for overall water splitting in alkaline media. *Journal of Power Sources*. 2016;333:213–36.
6. Liu J, et al. Short-range electronic engineering by coupling Fe phthalocyanines with MOF-derived N,S-doped carbon nanorods for oxygen reduction. *Science China Chemistry*. 2025.
7. Zhang K, Zou R. Advanced Transition Metal-Based OER Electrocatalysts: Current Status, Opportunities, and Challenges. *Small*. 2021;17(37):e2100129. <https://doi.org/10.1002/smll.202100129> PMID: 34114334
8. Zafar F, Asad M, Sajjad W, Khan MA, Akhtar N, Hassan SU, et al. Machine learning guided tuning of metal precursors and solvent pH for superior OER performance of ZnO-Co3O4/C electrocatalysts. *International Journal of Hydrogen Energy*. 2025;98:384–93. <https://doi.org/10.1016/j.ijhydene.2024.12.006>
9. Li W, Liu Y, Azam A, Liu Y, Yang J, Wang D, et al. Unlocking Efficiency: Minimizing Energy Loss in Electrocatalysts for Water Splitting. *Adv Mater*. 2024;36(42):e2404658. <https://doi.org/10.1002/adma.202404658> PMID: 38923073
10. Huang C-J, Xu H-M, Shuai T-Y, Zhan Q-N, Zhang Z-J, Li G-R. A review of modulation strategies for improving catalytic performance of transition metal phosphides for oxygen evolution reaction. *Applied Catalysis B: Environmental*. 2023;325:122313. <https://doi.org/10.1016/j.apcatb.2022.122313>
11. Tian L, Li Z, Xu X, Zhang C. Advances in noble metal (Ru, Rh, and Ir) doping for boosting water splitting electrocatalysis. *J Mater Chem A*. 2021;9(23):13459–70. <https://doi.org/10.1039/d1ta01108a>
12. Farid MF, Rehman MU, Rehman JU, Sajjad W, Fazal MW, Khan MA, et al. In situ synthesis of manganese oxide/iron oxide/polyaniline composite catalyst for oxygen evolution reaction. *Journal of Materials Research*. 2024;39(6):981–91. <https://doi.org/10.1557/s43578-024-01286-9>
13. El-Shishtawy RM, Hussein MA, Al-Juaid SS, Fazal MW, El-Said WA, Akhtar N. N-Coordinated cobalt single atom-integrated electrospun nanofibers for an efficient oxygen evolution reaction. *New J Chem*. 2023;47(30):14177–84. <https://doi.org/10.1039/d3nj02322b>
14. Maghool S, Asgharinezhad AA, Larimi A, Ghotbi C, Khorasheh F. Enhanced oxygen evolution reaction performance using amorphous hollow cerium-doped cobalt phosphate derived from ZIF-67 structures. *Journal of Alloys and Compounds*. 2024;1008:176697. <https://doi.org/10.1016/j.jallcom.2024.176697>
15. Li A, Kong S, Guo C, Ooka H, Adachi K, Hashizume D, et al. Enhancing the stability of cobalt spinel oxide towards sustainable oxygen evolution in acid. *Nat Catal*. 2022;5(2):109–18. <https://doi.org/10.1038/s41929-021-00732-9>
16. Hayat K, Munawar A, Zulfiqar A, Akhtar MH, Ahmad HB, Shafiq Z, et al. CuO Hollow Cubic Caves Wrapped with Biogenic N-Rich Graphitic C for Simultaneous Monitoring of Uric Acid and Xanthine. *ACS Appl Mater Interfaces*. 2020;12(42):47320–9. <https://doi.org/10.1021/acsami.0c15243> PMID: 33023289
17. Yousefi Z, Asgharinezhad AA, Larimi A, Ghotbi C. Highly efficient electrocatalytic water oxidation based on non-precious metal oxides/sulfides derived from a FeCoNi-metal organic framework. *Journal of Alloys and Compounds*. 2024;1002:175214. <https://doi.org/10.1016/j.jallcom.2024.175214>
18. Maghool S, et al. Efficient electrocatalysts for OER: Amorphous cerium-doped cobalt sulfide with enhanced performance and durability. *Surfaces and Interfaces*. 2024;54:105108.
19. Saha P, Shaheen Shah S, Ali M, Nasiruzzaman Shaikh M, Aziz MA, Saleh Ahammad AJ. Cobalt Oxide-Based Electrocatalysts with Bifunctionality for High-Performing Rechargeable Zinc-Air Batteries. *Chem Rec*. 2024;24(1):e202300216. <https://doi.org/10.1002/tcr.202300216> PMID: 37651034
20. Yin Z, Zheng Y, Wang H, Li J, Zhu Q, Wang Y, et al. Engineering Interface with One-Dimensional Co3O4 Nanostructure in Catalytic Membrane Electrode: Toward an Advanced Electrocatalyst for Alcohol Oxidation. *ACS Nano*. 2017;11(12):12365–77. <https://doi.org/10.1021/acs.nano.7b06287> PMID: 29141144
21. Ong W-J, Tan L-L, Ng YH, Yong S-T, Chai S-P. Graphitic Carbon Nitride (g-C3N4)-Based Photocatalysts for Artificial Photosynthesis and Environmental Remediation: Are We a Step Closer To Achieving Sustainability?. *Chem Rev*. 2016;116(12):7159–329. <https://doi.org/10.1021/acs.chemrev.6b00075> PMID: 27199146
22. Khan MA, Mutahir S, Shaheen I, Qunhui Y, Bououdina M, Humayun M. Recent advances over the doped g-C3N4 in photocatalysis: A review. *Coordination Chemistry Reviews*. 2025;522:216227. <https://doi.org/10.1016/j.ccr.2024.216227>
23. Su H, et al. Atomic-level coordination structures meet graphitic carbon nitride (g-C3N4) for photocatalysis: Energy conversion and environmental remediation. *Applied Catalysis B: Environmental*. 2024;:123683.



24. Yu D, et al. One-step construction of Co (OH) 2-anchored g-C3N4 and rGO with phase junction for dopamine sensing and oxygen evolution reaction. *Journal of Nanostructure in Chemistry*. 2024;14(5):323–34.
25. Bairami Z, Asgharinezhad AA, Courtney JM, Larimi A, Khorasheh F. A novel CoCuNi-sulfide nanocatalyst derived from trimetallic zeolitic imidazolate framework for boosting oxygen evolution reaction performance: Comparison study of sulfides and oxides. *Materials Today Chemistry*. 2024;42:102398. <https://doi.org/10.1016/j.mtchem.2024.102398>
26. Fazal MW, et al. Zn and Co Loaded Porous C Decorated Electrospun Nanofibers as Efficient Oxygen Evolution Reaction for Water Splitting. *ACS Applied Energy Materials*. 2023;6(5):2739–46.
27. Park Y, Hwang C-K, Bang K, Hong D, Nam H, Kwon S, et al. Machine learning filters out efficient electrocatalysts in the massive ternary alloy space for fuel cells. *Applied Catalysis B: Environmental*. 2023;339:123128. <https://doi.org/10.1016/j.apcatb.2023.123128>
28. Chen L, Zhang X, Chen A, Yao S, Hu X, Zhou Z. Targeted design of advanced electrocatalysts by machine learning. *Chinese Journal of Catalysis*. 2022;43(1):11–32. [https://doi.org/10.1016/s1872-2067\(21\)63852-4](https://doi.org/10.1016/s1872-2067(21)63852-4)
29. Ding R, et al. Unlocking the potential: machine learning applications in electrocatalyst design for electrochemical hydrogen energy transformation. *Chemical Society Reviews*. 2024.
30. Abbas Y, Zuhra Z, Akhtar N, Ali S, Gong JR. Single-Step Fabrication of Visible-Light-Active ZnO-GaN:ZnO Branched Nanowire Array Photoanodes for Efficient Water Splitting. *ACS Appl Energy Mater*. 2018;1(8):3529–36. <https://doi.org/10.1021/acsaem.8b00346>
31. Wani AH, Sharma A. Optimizing the electrocatalytic discovery with machine learning as a novel paradigm. *Electrocatalytic materials*. Springer. 2024. p. 247–69.
32. Wang M, Zhu H. Machine Learning for Transition-Metal-Based Hydrogen Generation Electrocatalysts. *ACS Catal*. 2021;11(7):3930–7. <https://doi.org/10.1021/acscatal.1c00178>
33. Williams T, McCullough K, Lauterbach JA. Enabling Catalyst Discovery through Machine Learning and High-Throughput Experimentation. *Chem Mater*. 2019;32(1):157–65. <https://doi.org/10.1021/acs.chemmater.9b03043>
34. Zulficar A, Zafar F, Yaqub B, Mahmoud HMA, Shah M, Widaa EMA, et al. Cobalt oxide modified sulfur and phosphorus Co-doped g-C3N4 for screening of urinary human albumin. *Mikrochim Acta*. 2023;190(9):355. <https://doi.org/10.1007/s00604-023-05936-3> PMID: 37594627
35. Porfyrus AD, Papaspyrides CD, Rulkens R, Grolman E. Direct solid state polycondensation of tetra- and hexa-methylenediammonium terephthalate: Scaling up from the TGA micro-reactor to a laboratory autoclave. *J of Applied Polymer Sci*. 2017;134(29). <https://doi.org/10.1002/app.45080>
36. Younes YA, Kospa DA, Salama RS, Ahmed AI, Ibrahim AA. Hydrophilic candle wastes microcapsules as a thermal energy storage material for all-day steam and electricity cogeneration. *Desalination*. 2023;550:116377. <https://doi.org/10.1016/j.desal.2023.116377>
37. Imtiyaz A, Singh A, Gaur R. Comparative analysis and applications of green synthesized cobalt oxide (Co3O4) nanoparticles: A systematic review. *BioNanoScience*. 2024;1–19.
38. Al-Qasbi N. Sustainable and Efficacy Approach of Green Synthesized Cobalt Oxide (Co3O4) Nanoparticles and Evaluation of Their Cytotoxicity Activity on Cancerous Cells. *Molecules*. 2022;27(23):8163. <https://doi.org/10.3390/molecules27238163> PMID: 36500254
39. Hu Z, Shen Z, Yu JC. Phosphorus containing materials for photocatalytic hydrogen evolution. *Green Chem*. 2017;19(3):588–613. <https://doi.org/10.1039/c6gc02825j>
40. Varga K. Synthetic and computational investigation of phosphorus-containing Lewis acids bound by 2, 6-bis (benzimidazol-2-yl) pyridine. Carleton University; 2022.
41. Yu G, et al. Constructing a mixed  $\pi$ -conjugated bridge: a simple and effective approach to realize a large first hyperpolarizability in carbon nanotube-based systems. *Journal of Materials Chemistry C*. 2013;1(24):3833–41.
42. Jourshabani M, Shariatnia Z, Badiei A. Controllable synthesis of mesoporous sulfur-doped carbon nitride materials for enhanced visible light photocatalytic degradation. *Langmuir*. 2017;33(28):7062–78.
43. Babu P, et al. Synergistic effects of boron and sulfur co-doping into graphitic carbon nitride framework for enhanced photocatalytic activity in visible light driven hydrogen generation. *ACS Applied Energy Materials*. 2018;1(11):5936–47.
44. Potgieter-Vermaak S. Investigation into char structure using raman and petrographic techniques to assess combustion reactivity.
45. Smith CTG. Graphene oxide material interfaces in electronics, energy and environmental membranes. United Kingdom: University of Surrey. 2016.
46. Karaman C, Karaman O, Atar N, Yola ML. Tailoring of cobalt phosphide anchored nitrogen and sulfur co-doped three dimensional graphene hybrid: Boosted electrocatalytic performance towards hydrogen evolution reaction. *Electrochimica Acta*. 2021;380:138262. <https://doi.org/10.1016/j.electacta.2021.138262>
47. Wu H, Xia L, Ren J, Zheng Q, Xu C, Lin D. A high-efficiency N/P co-doped graphene/CNT@porous carbon hybrid matrix as a cathode host for high performance lithium–sulfur batteries. *J Mater Chem A*. 2017;5(38):20458–72. <https://doi.org/10.1039/c7ta06504c>
48. Moysiadou A, Lee S, Hsu C-S, Chen HM, Hu X. Mechanism of Oxygen Evolution Catalyzed by Cobalt Oxyhydroxide: Cobalt Superoxide Species as a Key Intermediate and Dioxide Release as a Rate-Determining Step. *J Am Chem Soc*. 2020;142(27):11901–14. <https://doi.org/10.1021/jacs.0c04867> PMID: 32539368
49. Yang H-H, McCreery RL. Elucidation of the Mechanism of Dioxide Reduction on Metal-Free Carbon Electrodes. *J Electrochem Soc*. 2000;147(9):3420. <https://doi.org/10.1149/1.1393915>
